# Supplementary material
Source: HighWire-hosted journal article supplement (https://bmjopen.bmj.com/content/15/1/e085950)

Supplementary Material

Table S1. Themes presented and source of those themes

| Support Sessions themes                                                                                                                                                                                                                                                                      | Data Source                             |
|----------------------------------------------------------------------------------------------------------------------------------------------------------------------------------------------------------------------------------------------------------------------------------------------|-----------------------------------------|
| <ul style="list-style-type: none"><li>You're Not Alone</li><li>Sharing Experiences and Addressing Worries</li><li>Gaining New Perspectives</li><li>Hope for Progression</li><li>Peer Support and Bonding</li></ul>                                                                           | Participant and practitioner interviews |
| <ul style="list-style-type: none"><li>Integration of facilitation skills</li><li>Modified activity pacing and goal setting</li><li>Giving participant's structure</li></ul>                                                                                                                  | Practitioner interviews                 |
| Exercise Sessions themes                                                                                                                                                                                                                                                                     |                                         |
| <ul style="list-style-type: none"><li>Monitoring and Modification of Online exercise</li><li>Catering for differing abilities</li><li>Feeling safe and confident to exercise</li><li>Progression of Fitness</li><li>Optimal timing in the recovery trajectory</li><li>Group Effect</li></ul> | Participant and practitioner interviews |
| <ul style="list-style-type: none"><li>Initial apprehension about exercise group</li><li>Gauging Exercise Capabilities</li><li>Translating Exercises into life</li><li>On Demand supplementary videos</li></ul>                                                                               | Participant interviews                  |
| 1: 1s Intervention and Control                                                                                                                                                                                                                                                               |                                         |
| <ul style="list-style-type: none"><li>Traumatic stories needing to be told: General and Control</li><li>Practitioner Support</li><li>Recovery Trajectory</li><li>Using the Your Covid Recovery resource</li></ul>                                                                            | Practitioner interviews                 |
| <ul style="list-style-type: none"><li>Trial processes and preference of allocation</li></ul>                                                                                                                                                                                                 | Participant interviews                  |

|                                                                                                                                                                                             |                                                |
|---------------------------------------------------------------------------------------------------------------------------------------------------------------------------------------------|------------------------------------------------|
| <ul style="list-style-type: none"><li>• Experiences</li><li>• Did Regain make a difference?</li><li>• Your Covid Recovery Resource</li></ul>                                                |                                                |
| <b>Contextual Issues</b>                                                                                                                                                                    |                                                |
| <ul style="list-style-type: none"><li>• Multiple IT issues</li><li>• Participants’ experiences within a pandemic</li><li>• Stigma of societal attitudes towards people’s recovery</li></ul> | <b>Participant and practitioner interviews</b> |
| <b>Practitioner Training</b>                                                                                                                                                                |                                                |
| <ul style="list-style-type: none"><li>• Preparation</li><li>• Group Facilitation</li><li>• Ongoing Support</li></ul>                                                                        | <b>Practitioner interviews</b>                 |

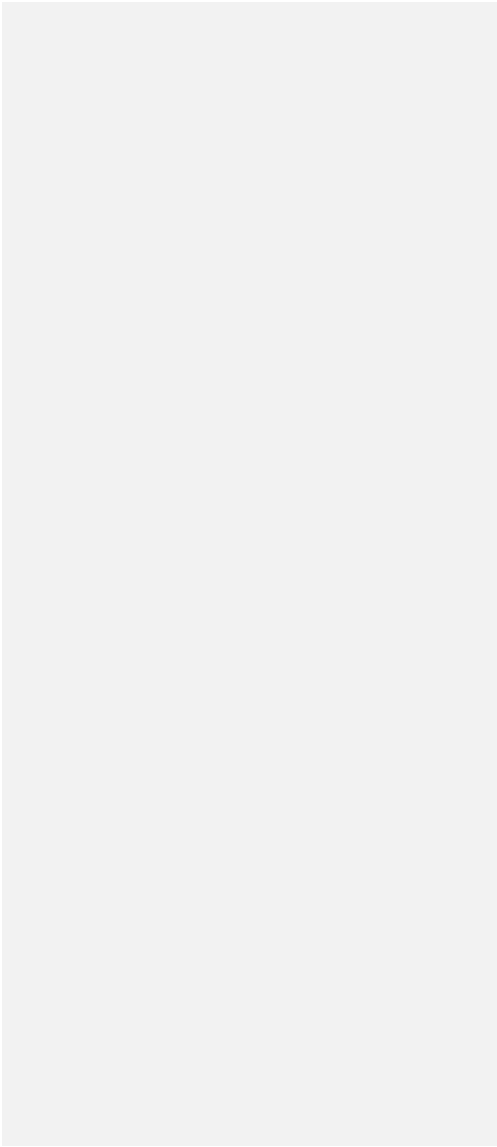

Supplement: inline-supplementary-material-2 [file inline-supplementary-material-2.pdf]
